# Supplementary material for: Terahertz spectroscopy for interpreting the formation and hierarchical structures of silk fibroin oligopeptides
Source: Royal Society of Chemistry journal article supplement (doi:10.1039/d1an02088a), 2022-01-01
Supplement: d1an02088a1.pdf [file d1an02088a1.pdf]

## Supporting Information

### **Terahertz Spectroscopy Technology for Interpreting the Formation and Hierarchical Structures of Silk Fibroin Oligopeptides**

Yujing Bian<sup>a</sup>, Xiaodong Wu<sup>a</sup>, Zhenqi Zhu<sup>a</sup>, Xun Zhang<sup>a</sup>, Ruonan Zeng<sup>a</sup>, and Bin Yang<sup>a,\*</sup>

<sup>a</sup> Key Laboratory of Advanced Textile Materials and Manufacturing Technology of Ministry of Education, Zhejiang Sci-Tech University, Hangzhou, 310018, Zhejiang, China.

\* Corresponding author email: yangbin5959@zstu.edu.cn

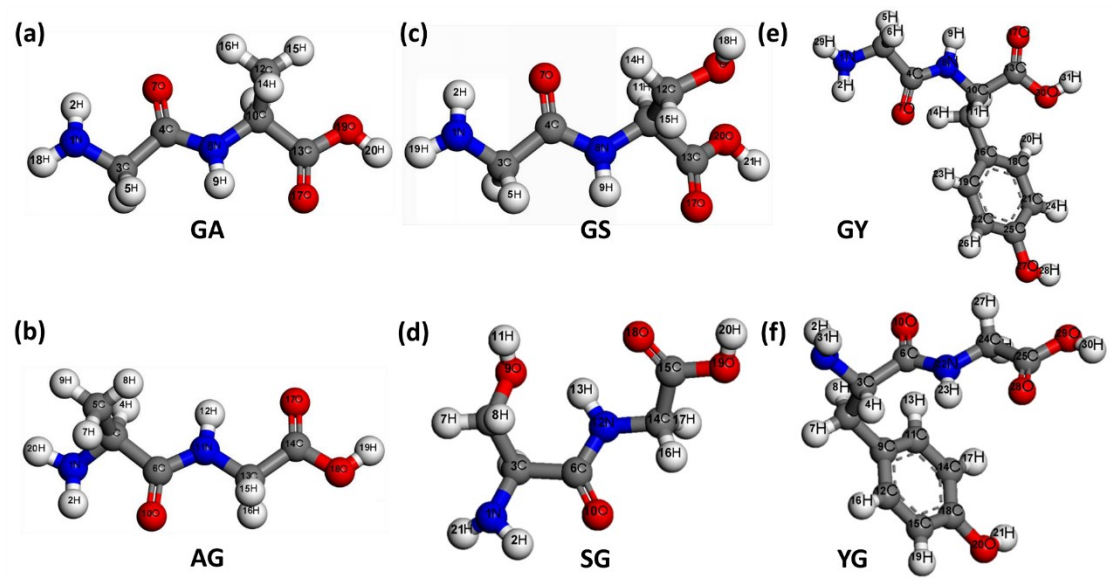

**Figure S1** The molecular structures of six dipeptides after optimization: (a) GA, (b) AG, (c) GS, (d) SG, (e) GY, (f) YG.

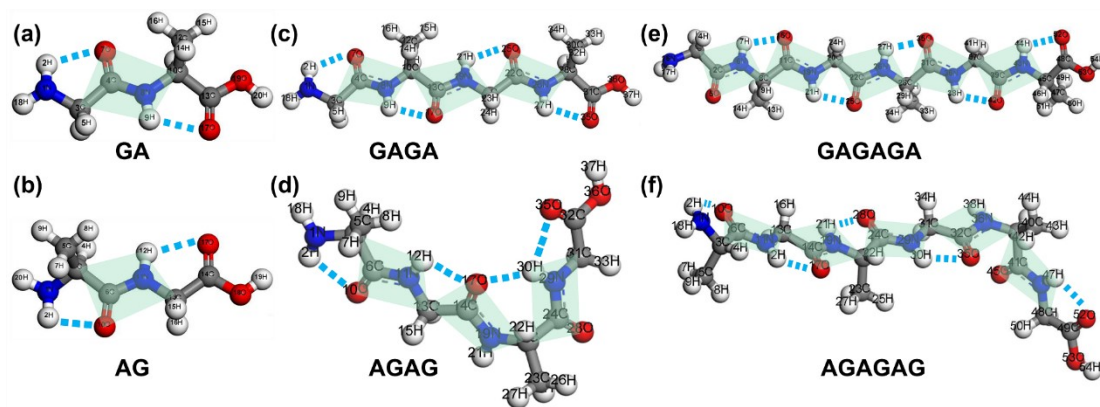

**Figure S2** DFT simulated molecular structures of six oligopeptides: (a) GA, (b) AG, (c) GAGA, (d) AGAG, (e) GAGAGA, and (f) AGAGAG.

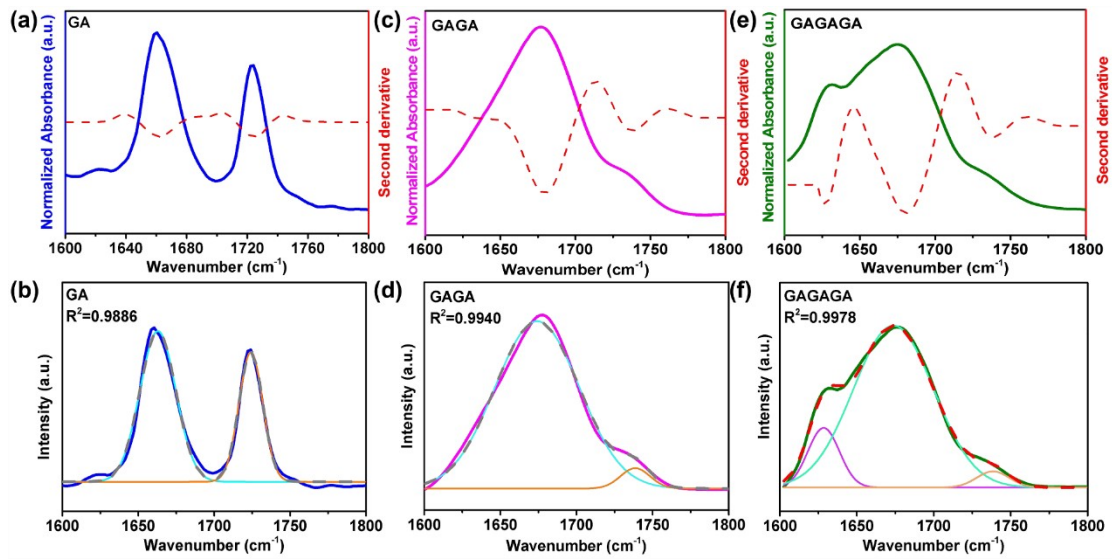

**Figure S3** Second derivative absorbance spectra in the Amide I region (1600–1800)  $\text{cm}^{-1}$  for samples (GA, GAGA, and GAGAGA) indicating various secondary structures like  $\alpha$ -helix (the orange solid line), random coils (light blue solid line), and  $\beta$ -sheet (purple solid line). The red dotted line represents the second derivative of the infrared spectrum of the three samples, respectively. The gray dotted line shows the fitting curve.

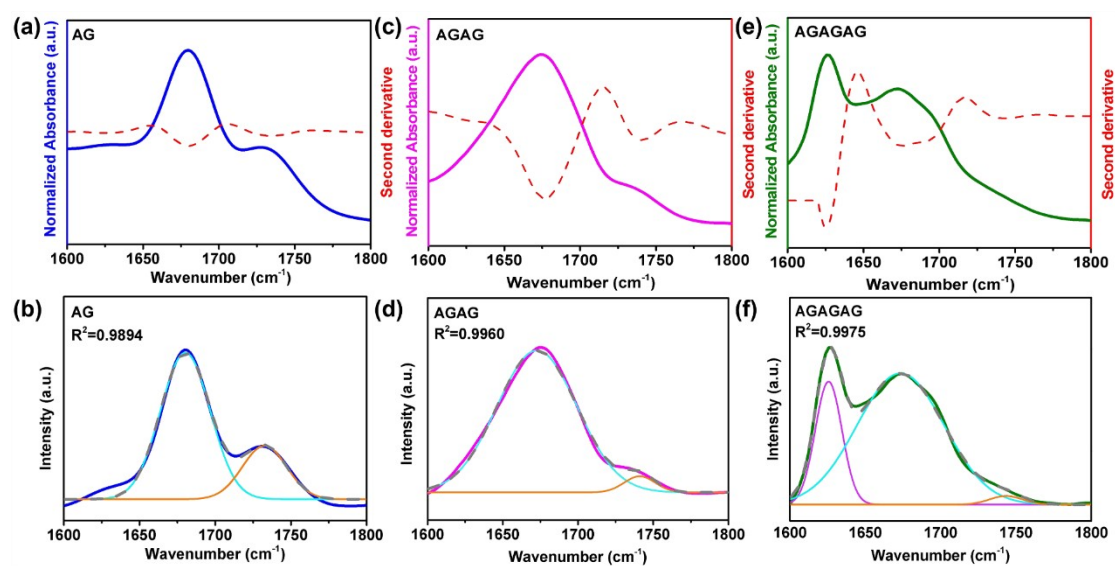

**Figure S4** Second derivative absorbance spectra in the Amide I region (1600–1800)  $\text{cm}^{-1}$  for samples (AG, AGAG, and AGAGAG) indicating various secondary structures like  $\alpha$ -helix (the orange solid line), random coils (light blue solid line), and  $\beta$ -sheet (purple solid line). The red dotted line represents the second derivative of the infrared spectrum of the three samples, respectively. The gray dotted line shows the fitting curve.

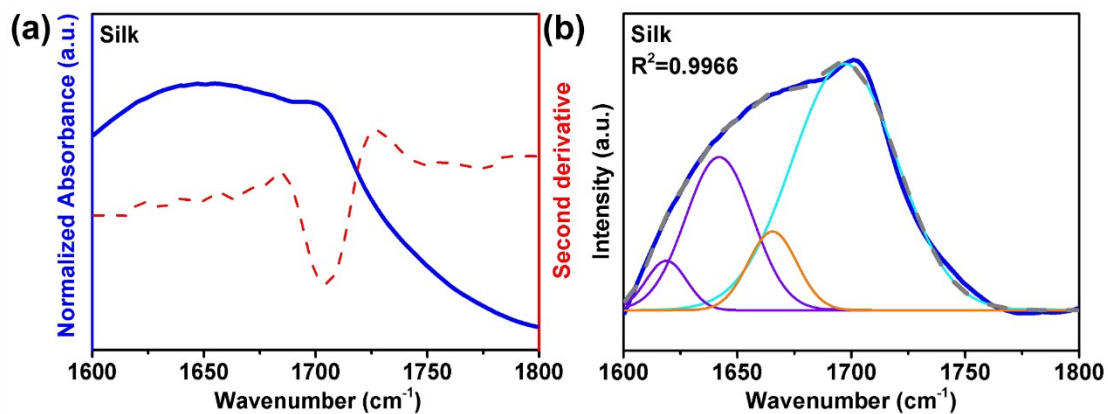

**Figure S5** Second derivative absorbance spectra in the Amide I region (1600–1800)  $\text{cm}^{-1}$  for silk indicating various secondary structures like  $\alpha$ -helix (the orange solid line), random coils (light blue solid line), and  $\beta$ -sheet (purple solid line). The red dotted line represents the second derivative of the infrared spectrum of the three samples, respectively. The gray dotted line shows the fitting curve.
